# Supplementary material for: Multi-mycotoxin Contamination in Maize from Niger State, Nigeria: Occurrence, Dietary Exposure and Health Risk Assessment
Source: Research Square preprint supplement (doi:10.21203/rs.3.rs-7479286/v1), 2025-09-16
Supplement: Supplementary file 1 [file 376d793584b6b81639fd8428.docx]

**Supplementary Material**

**Table s1:** Calibration and Validation Metrics of the HPLC Method for Mycotoxin Analysis in Maize.

| **Analyte** | **Calibration level (µg/kg)** | ****r*2** | **Apparent recovery (%)** | **LOD(µg/kg)** | **LOQ (µg/kg)** |
| --- | --- | --- | --- | --- | --- |
| AFB1 | 2.5, 5.0, 10.0 20.0, 40.0 | 0.9952 | 92 | 0.027 | 0.071 |
| AFB2 | 5.0, 10.0, 20.0, 40.0, 80.0 | 0.9931 | 88 | 0.02 | 0.06 |
| AFG1 | 2.5, 5.0, 10.0, 20.0, 40.0 | 0.9945 | 90 | 0.001 | 0.003 |
| AFG2 | 2.5, 5.0, 10.0, 20.0, 40.0 | 0.9908 | 83 | 0.003 | 0.009 |
| CPA | 0.001, 0.01, 0.1, 1.0, 10.0 | 0.9904 | 85 | 0.02 | 0.06 |
| DON/ NIV | 15.5, 25.0, 50.0, 100.0, 200.0 | 0.9937 | 87.7 | 0.743 | 2.129 |

AFB1 = Aflatoxin B1; AFB2 = Aflatoxin B2; AFG1 = Aflatoxin G1; AFG2 = Aflatoxin G2; DON= deoxynivalenol; CPA = cyclopiazonic acids; NIV = nivalenol

*Coefficient of determination (*r*2); LOD=Limit of Detection; LOQ = Limit of Quantification

**Table s2: Validation Results of the ELISA Method for Mycotoxin Analysis in Maize**

| Mycotoxins | LOD  (µg/kg) | LOQ  (µg/kg) | Apparent Recovery (%) | Calibration level  (µg/kg) | Wavelength |
| --- | --- | --- | --- | --- | --- |
| FUM | 200 | 250 – 5000 | 80±6.8% | 0, 250, 500, 1000, 2500, 5000 | 450nm and 630 nm differential ﬁlter |
| ZEN | 20 | 40 – 1000 | 70±8.2% | 0, 40, 100, 300, 1000 | 450nm and 630 nm differential ﬁlter |
| OTA | 1.9 | 2 – 40 | 90 ± 20% | 0, 2, 5, 10, 20, 40 | 450nm and 630 nm differential ﬁlter |

FUM = Total fumonisins; ZEN = Zearalenone; OTA = Ochratoxin A

LOD=Limit of Detection; LOQ = Limit of Quantification

**Table s3**: Occurrence and Concentrations of Mycotoxins (µg/kg) in Maize Collected across Four Micro-Climatic Zones of Niger State, Nigeria

| **Zone** | **Statistic** | **AFB1** | **AFB2** | **AFG1** | **AFG2** | **AFs** | **DON** | **FUMs** | **NIV** | **ZEN** | **CPA** | **OTA** |
| --- | --- | --- | --- | --- | --- | --- | --- | --- | --- | --- | --- | --- |
| Wettest  (*n = 8*) | Pos (%) | 100 | 37.5 | 75.0 | 12.5 | 100 | 62.5 | 87.5 | 50 | 25 | 50 | 75 |
| Range (µg/kg) | 0.04-62.5 | 0.03-53.21 | 0.002-643.7 | 0.0-11.03 | 1.86-682.88 | 1.17-342.6 | 364.15-4547.17 | 0.54-7.91 | 47.89-235.79 | 1.0-77.9 | 3.48-7.4 |
| Mean ± SD (µg/kg) | 19.35±4.28a | 6.90±2.1c | 82.37±29.45c | 1.38±0.56b | 109.99±61.136c | 47.39±9.57c | 2113.29±754.73 | 1.43±0.35b | 35.46±9.88c | 18.53±7.15b | 3.86±1.31a |
| > EU guideline (%) | 75 | - | - | - | 62.5 | 0.0 | 62.5 | - | 0.0 | - | 37.5 |
| Wet  (*n = 8*) | Pos (%) | 75 | 0.0 | 62.5 | 50 | 100 | 12.5 | 100 | 12.5 | 25 | 25 | 75 |
| Range (µg/kg) | 2.72-25.47 | - | 0.003-1.84 | 0.14-3.99 | 0.003-29.46 | 0.00-4.03 | 879.87-2471.70 | 0-1.18 | 69.47-73.68 | 45.72-75.31 | 6.30-11.62 |
| Mean ± SD (µg/kg) | 8.41±2.19a | - | 0.24±0.10a | 0.86±0.23a | 9.51±4.23a | 0.50±0.02a | 1506.25±50.66 | 0.15±0.01a | 17.89±6.73a | 5.88±3.05a | 7.61±3.21a |
| > EU guideline (%) | 75 | - | - | - | 62.5 | 0.0 | 87.5 | - | 0.0 | - | 75 |
| Dry  (*n = 8*) | Pos (%) | 87.5 | 50 | 75 | 25 | 100 | 25 | 87.5 | 12.5 | 25 | 50 | 87.5 |
| Range (µg/kg) | 0.38-74.76 | 0.35-23.33 | 0.01-95.87 | 3.82-7.32 | 4.40-113.17 | 3.37-314.96 | 364.15-4889.31 | 0.0-1.18 | 53.68-180.00 | 39.37-417.25 | 4.91-17.99 |
| Mean ± SD (µg/kg) | 22.62±10.1a | 5.41±1.37bc | 16.43±4.23b | 1.39±0.49b | 45.85±14.89b | 39.79±13.03c | 1539.94±865.48 | 0.15±0.01a | 29.21±8.12ab | 78.41±39.13c | 7.32±3.67b |
| > EU guideline (%) | 75 | - | - | - | 100 | 0.0 | 62.5 | - | 0.0 | - | 87.5 |
| Driest  (*n = 8*) | Pos (%) | 87.5 | 25 | 75 | 37.5 | 100 | 50 | 87.5 | 37.5 | 12.5 | 25 | 75 |
| Range (µg/kg) | 1.13-367.09 | 10.98-12.41 | 0.02-18.14 | 0.45-2.45 | 3.10-369.16 | 1.29-85.29 | 389.31-4301.89 | 0.96-28.80 | 0-181.58 | 10.31-14.71 | 4.11-23.23 |
| Mean ± SD (µg/kg) | 58.60±29.82b | 2.92±1.13b | 3.60±1.45a | 0.48±0.19a | 65.60±31.35b | 11.78±3.41b | 1612.03±709.13 | 4.54±1.24c | 22.70±5.71ab | 3.13±1.29a | 6.52±2.91b |
| > EU guideline (%) | 75 | - | - | - | 62.5 | 0.0 | 75 | - | 0.0 | - | 37.5 |
| Total  (*n = 32*) | Pos (%) | 87.5 | 28.13 | 71.88 | 31.25 | 100 | 37.5 | 90.63 | 28.13 | 21.88 | 37.50 | 78.13 |
| Range (µg/kg) | 0.04-367.09 | 0.03-53.21 | 0.002-643.73 | 0.14-11.03 | 0.003-682.88 | 1.17-342.62 | 364.15-4889.31 | 0.54-28.80 | 47.89-235.79 | 1.00-417.25 | 3.488-23.23 |
| Mean ± SD (µg/kg) | 27.24±21.36 | 3.81±1.47 | 25.66±11.98 | 1.03±0.0.01 | 57.74±35.08 | 24.86±5.77 | 1692.88±1034.24 | 1.57±2.13 | 26.32±18.72 | 28.80±9.58 | 5.94±1.29 |
| > EU guideline (%) | 75 | - | - | - | 71.88 | 0.0 | 71.88 | - | 0.0 | - | 56.25 |

Note: Within each column, means bearing different superscript letters differ significantly at p < 0.05. Mean = average concentration; SD = standard deviation; EU limit = maximum levels permitted by the European Union for AFB1 (2 µg/kg), total AFs (4 µg/kg), DON (1250 µg/kg), FUMs (1000 µg/kg), ZEN (100 µg/kg), and OTA (5 µg/kg). Pos = percentage of positive samples; >EU limit (%) = proportion of positive samples exceeding EU limits. AFB2 was absent in wet zone.

**Table s4**: Distribution of Mycotoxins (µg/kg) in Maize According to Sample Type and Collection Site (Market or Storage), Niger State, Nigeria

|  | **Statistic** | **AFB1** | **AFB2** | **AFG1** | **AFG2** | **AFT** | **DON** | **FUM** | **NIV** | **ZEN** | **CPA** | **OTA** |
| --- | --- | --- | --- | --- | --- | --- | --- | --- | --- | --- | --- | --- |
| Market  (*n = 16*) | Pos (%) | 81.25 | 25 | 75 | 31.25 | 100 | 43.75 | 93.75 | 31.25 | 25 | 37.5 | 87.5 |
| Mean ± SD (µg/kg) | 18.24±5.78 | 4.25±1.69 | 42.96±13.12 | 1.26±0.48 | 66.70±24.18 | 28.53±6.65 | 1697.19±462.26 | 2.52±0.58 | 33.95±7.88 | 14.42±5.86 | 7.93±5.19 |
| Range (µg/kg) | 0.04-76.67 | 0.35-53.21 | 0.002-643.73 | 0.39-11.03 | 0.003-682.88 | 1.29-342.62 | 364.15-4889.31 | 0.54-28.80 | 53.68-235.79 | 1.00-83.61 | 4.11-23.23 |
| > EU guideline (%) | 75 | - | - | - | 68.75 | 0 | 75 | - | 0 | - | 68.75 |
| Stored  (*n = 16*) | Pos (%) | 93.75 | 31.25 | 68.75 | 31.25 | 100 | 31.25 | 87.5 | 25 | 18.75 | 37.5 | 68.75 |
| Mean ± SD (µg/kg) | 36.25±12.21 | 3.37±1.57 | 8.36±2.21 | 0.80±0.33 | 48.78±27.19 | 21.20±5.22 | 1688.56±194.89 | 0.61±0.01 | 18.68±5.78 | 43.18±28.39 | 3.95±1.72 |
| Range (µg/kg) | 0.38-367.09 | 0.03-23.33 | 0.004-95.87 | 0.14-3.99 | 1.86-369.16 | 1.17-314.96 | 389.31-4452.20 | 0.96-6.56 | 47.89-181.58 | 19.75-417.25 | 3.48-7.99 |
| > EU guideline (%) | 75 | - | - | - | 75 | 0 | 68.75 | - | 0 | - | 43.75 |
| White  (*n = 16*) | Pos (%) | 93.75 | 18.75 | 62.5 | 31.25 | 100 | 31.25 | 81.25 | 25 | 12.5 | 50 | 81.25 |
| Mean ± SD (µg/kg) | 41.58±14.47 | 1.60±0.89 | 1.34±0.67 | 1.26±0.79 | 45.79±17.92 | 7.01±2.72 | 1375.85±368.24 | 0.29±0.01 | 15.95±3.21 | 45.63±16.44 | 6.94±3.55 |
| Range (µg/kg) | 0.04-367.09 | 0.35-23.33 | 0.002-14.44 | 0.45-11.03 | 0.003-369.16 | 2.00-85.29 | 364.15-4547.17 | 0.54-1.90 | 73.68-181.58 | 10.31-417.25 | 3.48-23.23 |
| > EU guideline (%) | 87.5 | - | - | - | 68.75 | 0 | 62.5 | - | 0 | - | 56.25 |
| Yellow  (*n = 16)* | Pos (%) | 81.25 | 37.5 | 81.25 | 31.25 | 100 | 43.75 | 100 | 31.25 | 31.25 | 25 | 75 |
| Mean ± SD (µg/kg) | 12.91±4.32 | 6.01±1.65 | 49.98±18.53 | 0.79±0.28 | 69.69±31.72 | 42.72±8.44 | 2009.91±952.83 | 2.84±0.99 | 36.68±11.04 | 11.96±4.55 | 4.93±2.22 |
| Range (µg/kg) | 0.38-76.67 | 0.03-53.21 | 0.004-643.73 | 0.14-7.32 | 0.44-682.88 | 1.17-342.62 | 364.15-4889.31 | 0.96-28.80 | 47.89-235.79 | 1.00-87.07 | 3.52-10.53 |
| > EU guideline (%) | 62.5 | - | - | - | 75 | 0 | 81.25 | - | 0 | - | 56.25 |

**Table s5:** Multi-Mycotoxin Contamination in Maize

| No of co-occurring toxins | Co-occurring toxins | Number of samples | Occurrence (%) |
| --- | --- | --- | --- |
| Two toxins | AFs/FUM | 3 | 9.38 |
|  | AFs/DON | 1 | 3.13 |
|  | AFs/ZEN | 1 | 3.13 |
|  | AFs/FUM/NIV | 1 | 3.13 |
| Three Toxins | AFs/FUM/OTA | 2 | 6.25 |
|  | AFs/OTA/ZEN | 1 | 3.13 |
|  | AFs/CPA/FUM/NIV | 1 | 3.13 |
| Four toxins | AFs/FUM/OTA/NIV | 5 | 15.63 |
|  | AFs/DON/FUM/OTA | 3 | 9.38 |
|  | AFs/CPA/FUM/OTA | 2 | 6.25 |
| Five toxins | AFs/CPA/DON/FUM/OTA | 6 | 18.75 |
| AFs/CPA/FUM/OTA/ZEN | 3 | 9.38 |
| AFs/DON/FUM/OTA/NIV | 1 | 3.13 |
| AFs/DON/FUM/OTA/ZEN | 1 | 3.13 |
| AFs/FUM/OTA/NIV/ZEN | 1 | 3.13 |


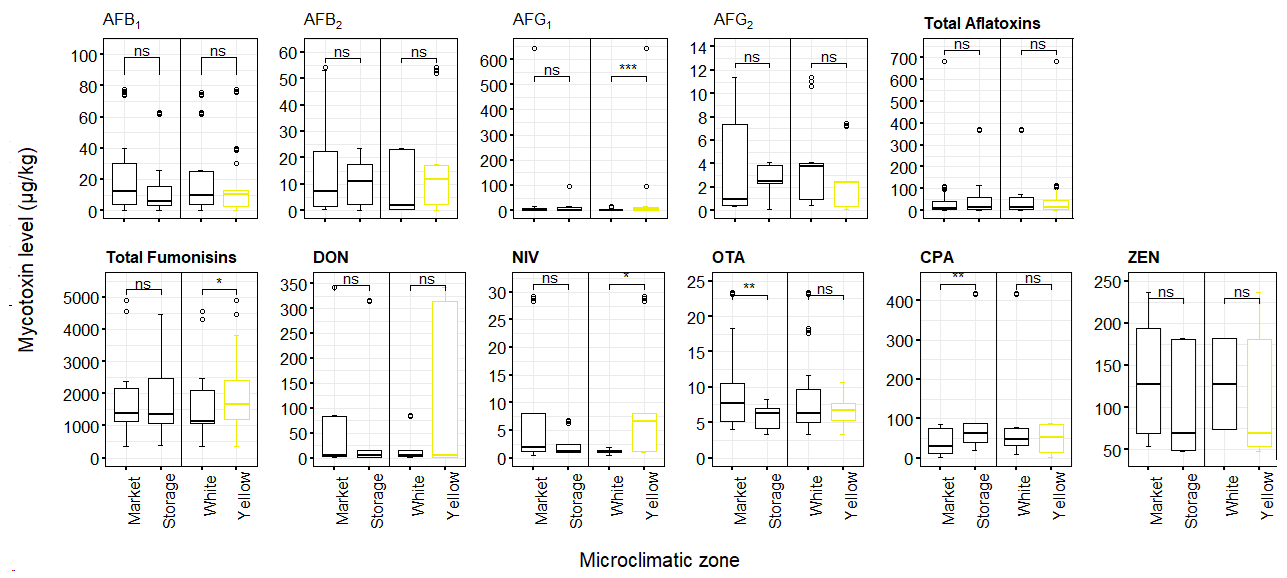
**Figure s1**: Mycotoxin Occurrence and Levels in Maize Classified by Source (Market or Stored) and Variety (White and Yellow).
